# Supplementary material for: Copper-catalyzed decarboxylative stereospecific amidation of cinnamic acids with N-fluorobenzenesulfonimide
Source: Royal Society of Chemistry journal article supplement (doi:10.1039/c6ra16115d), 2016-01-01

## Supporting Information

### Copper-catalyzed Decarboxylative Stereospecific Amidation of Cinnamic Acids with *N*-Fluorobenzenesulfonimide

Daoshan Yang,\* Mingyang Sun, Wei Wei, Jin Li, Laijin Tian, and Hua Wang\*

Shandong Province Key Laboratory of Life-Organic Analysis, School of Chemistry  
and Chemical Engineering, Qufu Normal University, Qufu 273165, P. R. China

Fax: +86-5374458306

E-mail: [yangdaoshan@tsinghua.org.cn](mailto:yangdaoshan@tsinghua.org.cn); [huawang\\_qfnu@126.com](mailto:huawang_qfnu@126.com)

### Table of contents

|                                                                                  |     |
|----------------------------------------------------------------------------------|-----|
| General Information                                                              | P2  |
| General experimental procedures for synthesis of ( <i>E</i> )-amination products | P2  |
| Crystal preparation and X-ray diffraction analysis of compound <b>3a</b>         | P3  |
| Characterization data of compounds                                               | P12 |
| The <sup>1</sup> H and <sup>13</sup> C NMR spectra of compounds <b>3a-3k</b>     | P17 |

## **General.**

All commercially available reagent grade chemicals were purchased from chemical suppliers and used as received without further purification.  $^1\text{H}$  NMR and  $^{13}\text{C}$  NMR spectra were recorded in  $\text{CDCl}_3$  on a 500 MHz spectrometer with TMS as internal standard (500 MHz  $^1\text{H}$ , 125 MHz  $^{13}\text{C}$ ) at room temperature, the chemical shifts ( $\delta$ ) were expressed in ppm and  $J$  values were given in Hz. The following abbreviations are used to indicate the multiplicity: singlet (s), doublet (d), triplet (t), quartet (q) and multiplet (m). Column chromatography was performed on silica gel (200-300 mesh). Mass analyses and HRMS were obtained by ESI on a TOF mass analyzer.

## **General experimental procedures for synthesis of (*E*)- amination products.**

A 25 mL Schlenk tube equipped with a magnetic stirring bar was charged with cinnamic acids (0.3 mmol), CuI (19 mg, 0.075 mmol), AIBN (98.4 mg, 0.6 mmol) and NFSI (113 mg, 0.36 mmol). The tube was evacuated twice and backfilled with nitrogen, and  $\text{CH}_3\text{CN}$  (2 mL) was added into the tube. The tube was sealed and then the mixture was allowed to stir under nitrogen atmosphere at 60 °C for 24 h. After completion of the reaction, the resulting solution was cooled down to room temperature, and the solvent was removed with the aid of a rotary evaporator. The desired product was obtained by column chromatography on silica gel using petroleum ether/ethyl acetate as eluent.

## Crystal preparation and X-ray diffraction analysis of compound 3n

### Crystal preparation of compound 3b.

Compound **3a** (20 mg) was dissolved in 6 mL of petroleum ether/ethyl acetate = 3:1, and it was crystallized to give crystal as colorless prisms after the solvent was slowly volatilized in 3 days at room temperature (~ 25 °C).

### X-Ray diffraction analysis of compound 3a.

---

|                                   |                                                                                                                          |
|-----------------------------------|--------------------------------------------------------------------------------------------------------------------------|
| Identification code               | sad                                                                                                                      |
| Empirical formula                 | C <sub>20</sub> H <sub>17</sub> N O <sub>4</sub> S <sub>2</sub>                                                          |
| Formula weight                    | 399.47                                                                                                                   |
| Temperature                       | 295(2) K                                                                                                                 |
| Wavelength                        | 0.71073 Å                                                                                                                |
| Crystal system, space group       | Monoclinic, P21/c                                                                                                        |
| Unit cell dimensions              | a = 14.0128(17) Å    alpha = 90 deg.<br>b = 8.8244(11) Å    beta = 112.361(2) deg.<br>c = 16.431(2) Å    gamma = 90 deg. |
| Volume                            | 1879.0(4) Å <sup>3</sup>                                                                                                 |
| Z, Calculated density             | 4, 1.412 Mg/m <sup>3</sup>                                                                                               |
| Absorption coefficient            | 0.310 mm <sup>-1</sup>                                                                                                   |
| F(000)                            | 832                                                                                                                      |
| Crystal size                      | 0.38 x 0.26 x 0.20 mm                                                                                                    |
| Theta range for data collection   | 2.54 to 26.00 deg.                                                                                                       |
| Limiting indices                  | -16<=h<=17, -10<=k<=10, -20<=l<=17                                                                                       |
| Reflections collected / unique    | 11525 / 3687 [R(int) = 0.0401]                                                                                           |
| Completeness to theta = 26.00     | 99.9 %                                                                                                                   |
| Absorption correction             | Semi-empirical from equivalents                                                                                          |
| Max. and min. transmission        | 0.9407 and 0.8914                                                                                                        |
| Refinement method                 | Full-matrix least-squares on F <sup>2</sup>                                                                              |
| Data / restraints / parameters    | 3687 / 7 / 244                                                                                                           |
| Goodness-of-fit on F <sup>2</sup> | 1.046                                                                                                                    |

---

|                                      |                                       |
|--------------------------------------|---------------------------------------|
| Final R indices [ $I > 2\sigma(I)$ ] | R1 = 0.0621, wR2 = 0.1508             |
| R indices (all data)                 | R1 = 0.0952, wR2 = 0.1690             |
| Largest diff. peak and hole          | 1.001 and -0.537 e. $\text{\AA}^{-3}$ |

**Table 2.** Atomic coordinates (  $\times 10^4$ ) and equivalent isotropic displacement parameters ( $\text{\AA}^2 \times 10^3$ ) for a.  $U(\text{eq})$  is defined as one third of the trace of the orthogonalized  $U_{ij}$  tens

|       | <b>x</b> | <b>y</b> | <b>z</b> | <b>U(eq)</b> |
|-------|----------|----------|----------|--------------|
| C(1)  | 937(3)   | 1233(5)  | 2303(3)  | 83(1)        |
| C(2)  | 167(4)   | 413(6)   | 2464(3)  | 101(2)       |
| C(3)  | -713(4)  | 76(5)    | 1762(4)  | 101(2)       |
| C(4)  | -850(4)  | 528(6)   | 948(4)   | 105(2)       |
| C(5)  | -102(4)  | 1281(6)  | 809(3)   | 88(1)        |
| C(6)  | 800(3)   | 1642(4)  | 1461(3)  | 64(1)        |
| C(7)  | 1654(4)  | 2501(5)  | 1352(4)  | 97(2)        |
| C(8)  | 1851(4)  | 2765(5)  | 750(4)   | 100(2)       |
| C(9)  | 2399(3)  | 6575(4)  | 978(2)   | 54(1)        |
| C(10) | 1666(3)  | 6679(4)  | 1356(3)  | 70(1)        |
| C(11) | 1872(4)  | 7626(5)  | 2072(3)  | 88(1)        |
| C(12) | 2776(4)  | 8439(5)  | 2391(3)  | 85(1)        |
| C(13) | 3482(4)  | 8331(5)  | 2006(3)  | 79(1)        |
| C(14) | 3303(3)  | 7393(4)  | 1292(3)  | 64(1)        |
| C(15) | 3823(2)  | 2093(4)  | -83(2)   | 49(1)        |
| C(16) | 3612(3)  | 562(4)   | -164(2)  | 57(1)        |
| C(17) | 3627(3)  | -188(5)  | -890(3)  | 70(1)        |
| C(18) | 3847(3)  | 575(6)   | -1520(3) | 74(1)        |
| C(19) | 4065(3)  | 2097(6)  | -1437(2) | 71(1)        |
| C(20) | 4060(3)  | 2878(4)  | -706(2)  | 59(1)        |
| N(1)  | 2594(2)  | 3650(3)  | 579(2)   | 58(1)        |

|      |         |         |         |       |
|------|---------|---------|---------|-------|
| O(1) | 4454(2) | 4341(3) | 1020(2) | 68(1) |
| O(2) | 3972(2) | 1947(3) | 1528(2) | 69(1) |
| O(3) | 1083(2) | 5152(4) | -351(2) | 89(1) |
| O(4) | 2791(2) | 5734(3) | -377(2) | 82(1) |
| S(1) | 3817(1) | 3042(1) | 855(1)  | 53(1) |
| S(2) | 2171(1) | 5334(1) | 95(1)   | 64(1) |

**Table 3. Bond lengths [Å] and angles [deg] for a.**

|             |          |
|-------------|----------|
| C(1)-C(6)   | 1.370(5) |
| C(1)-C(2)   | 1.405(6) |
| C(1)-H(1)   | 0.9300   |
| C(2)-C(3)   | 1.362(6) |
| C(2)-H(2)   | 0.9300   |
| C(3)-C(4)   | 1.338(6) |
| C(3)-H(3)   | 0.9300   |
| C(4)-C(5)   | 1.332(6) |
| C(4)-H(4)   | 0.9300   |
| C(5)-C(6)   | 1.348(5) |
| C(5)-H(5)   | 0.9300   |
| C(6)-C(7)   | 1.484(6) |
| C(7)-C(8)   | 1.147(6) |
| C(7)-H(7)   | 0.9300   |
| C(8)-N(1)   | 1.412(5) |
| C(8)-H(8)   | 0.9300   |
| C(9)-C(14)  | 1.377(5) |
| C(9)-C(10)  | 1.390(5) |
| C(9)-S(2)   | 1.747(4) |
| C(10)-C(11) | 1.381(6) |
| C(10)-H(10) | 0.9300   |

---

|                |          |
|----------------|----------|
| C(11)-C(12)    | 1.376(7) |
| C(11)-H(11)    | 0.9300   |
| C(12)-C(13)    | 1.365(6) |
| C(12)-H(12)    | 0.9300   |
| C(13)-C(14)    | 1.377(6) |
| C(13)-H(13)    | 0.9300   |
| C(14)-H(14)    | 0.9300   |
| C(15)-C(20)    | 1.377(5) |
| C(15)-C(16)    | 1.379(5) |
| C(15)-S(1)     | 1.758(3) |
| C(16)-C(17)    | 1.371(5) |
| C(16)-H(16)    | 0.9300   |
| C(17)-C(18)    | 1.364(6) |
| C(17)-H(17)    | 0.9300   |
| C(18)-C(19)    | 1.372(6) |
| C(18)-H(18)    | 0.9300   |
| C(19)-C(20)    | 1.388(5) |
| C(19)-H(19)    | 0.9300   |
| C(20)-H(20)    | 0.9300   |
| N(1)-S(2)      | 1.683(3) |
| N(1)-S(1)      | 1.685(3) |
| O(1)-S(1)      | 1.414(3) |
| O(2)-S(1)      | 1.420(2) |
| O(3)-S(2)      | 1.427(3) |
| O(4)-S(2)      | 1.412(3) |
| C(6)-C(1)-C(2) | 120.2(4) |
| C(6)-C(1)-H(1) | 119.9    |
| C(2)-C(1)-H(1) | 119.9    |
| C(3)-C(2)-C(1) | 117.7(4) |

---

---

|                   |          |
|-------------------|----------|
| C(3)-C(2)-H(2)    | 121.1    |
| C(1)-C(2)-H(2)    | 121.1    |
| C(4)-C(3)-C(2)    | 121.4(5) |
| C(4)-C(3)-H(3)    | 119.3    |
| C(2)-C(3)-H(3)    | 119.3    |
| C(5)-C(4)-C(3)    | 119.8(5) |
| C(5)-C(4)-H(4)    | 120.1    |
| C(3)-C(4)-H(4)    | 120.1    |
| C(4)-C(5)-C(6)    | 122.8(5) |
| C(4)-C(5)-H(5)    | 118.6    |
| C(6)-C(5)-H(5)    | 118.6    |
| C(5)-C(6)-C(1)    | 118.0(4) |
| C(5)-C(6)-C(7)    | 125.5(5) |
| C(1)-C(6)-C(7)    | 116.5(4) |
| C(8)-C(7)-C(6)    | 132.6(6) |
| C(8)-C(7)-H(7)    | 113.7    |
| C(6)-C(7)-H(7)    | 113.7    |
| C(7)-C(8)-N(1)    | 136.1(6) |
| C(7)-C(8)-H(8)    | 112.0    |
| N(1)-C(8)-H(8)    | 112.0    |
| C(14)-C(9)-C(10)  | 121.8(4) |
| C(14)-C(9)-S(2)   | 119.5(3) |
| C(10)-C(9)-S(2)   | 118.6(3) |
| C(11)-C(10)-C(9)  | 118.1(4) |
| C(11)-C(10)-H(10) | 121.0    |
| C(9)-C(10)-H(10)  | 121.0    |
| C(12)-C(11)-C(10) | 120.3(4) |
| C(12)-C(11)-H(11) | 119.9    |
| C(10)-C(11)-H(11) | 119.9    |

---

---

|                   |          |
|-------------------|----------|
| C(13)-C(12)-C(11) | 120.8(4) |
| C(13)-C(12)-H(12) | 119.6    |
| C(11)-C(12)-H(12) | 119.6    |
| C(12)-C(13)-C(14) | 120.5(4) |
| C(12)-C(13)-H(13) | 119.8    |
| C(14)-C(13)-H(13) | 119.8    |
| C(9)-C(14)-C(13)  | 118.6(4) |
| C(9)-C(14)-H(14)  | 120.7    |
| C(13)-C(14)-H(14) | 120.7    |
| C(20)-C(15)-C(16) | 121.7(3) |
| C(20)-C(15)-S(1)  | 119.7(3) |
| C(16)-C(15)-S(1)  | 118.6(3) |
| C(17)-C(16)-C(15) | 118.9(4) |
| C(17)-C(16)-H(16) | 120.6    |
| C(15)-C(16)-H(16) | 120.6    |
| C(18)-C(17)-C(16) | 120.3(4) |
| C(18)-C(17)-H(17) | 119.9    |
| C(16)-C(17)-H(17) | 119.9    |
| C(17)-C(18)-C(19) | 121.0(4) |
| C(17)-C(18)-H(18) | 119.5    |
| C(19)-C(18)-H(18) | 119.5    |
| C(18)-C(19)-C(20) | 119.8(4) |
| C(18)-C(19)-H(19) | 120.1    |
| C(20)-C(19)-H(19) | 120.1    |
| C(15)-C(20)-C(19) | 118.4(4) |
| C(15)-C(20)-H(20) | 120.8    |
| C(19)-C(20)-H(20) | 120.8    |
| C(8)-N(1)-S(2)    | 115.4(3) |
| C(8)-N(1)-S(1)    | 121.4(3) |

---



|                 |            |
|-----------------|------------|
| S(2)-N(1)-S(1)  | 123.19(17) |
| O(1)-S(1)-O(2)  | 120.24(16) |
| O(1)-S(1)-N(1)  | 107.25(15) |
| O(2)-S(1)-N(1)  | 105.40(15) |
| O(1)-S(1)-C(15) | 109.87(16) |
| O(2)-S(1)-C(15) | 107.93(16) |
| N(1)-S(1)-C(15) | 105.07(15) |
| O(4)-S(2)-O(3)  | 120.43(18) |
| O(4)-S(2)-N(1)  | 107.52(16) |
| O(3)-S(2)-N(1)  | 104.98(17) |
| O(4)-S(2)-C(9)  | 110.02(18) |
| O(3)-S(2)-C(9)  | 108.62(18) |
| N(1)-S(2)-C(9)  | 103.91(15) |

**Table 4.** Anisotropic displacement parameters ( $\text{Å}^2 \times 10^3$ ) for a. The anisotropic displacement factor exponent takes the form:

$$-2 \pi^2 [ h^2 a^{*2} U_{11} + \dots + 2 h k a^* b^* U_{12} ]$$

|       | U11    | U22    | U33    | U23    | U13    | U12    |
|-------|--------|--------|--------|--------|--------|--------|
| C(1)  | 61(3)  | 96(3)  | 85(3)  | -15(3) | 20(2)  | 16(2)  |
| C(2)  | 105(4) | 131(5) | 85(3)  | 42(3)  | 58(3)  | 54(4)  |
| C(3)  | 74(3)  | 76(3)  | 169(6) | 32(4)  | 66(4)  | 6(3)   |
| C(4)  | 73(3)  | 99(4)  | 127(5) | -16(4) | 20(3)  | -11(3) |
| C(5)  | 77(3)  | 105(4) | 77(3)  | 4(3)   | 24(2)  | 17(3)  |
| C(6)  | 63(2)  | 49(2)  | 87(3)  | 6(2)   | 39(2)  | 11(2)  |
| C(7)  | 97(3)  | 68(3)  | 160(5) | 12(3)  | 86(4)  | 6(2)   |
| C(8)  | 122(4) | 59(3)  | 166(5) | -8(3)  | 108(4) | -6(3)  |
| C(9)  | 56(2)  | 48(2)  | 58(2)  | 13(2)  | 22(2)  | 7(2)   |
| C(10) | 69(3)  | 58(2)  | 93(3)  | 2(2)   | 42(2)  | 3(2)   |
| C(11) | 120(4) | 62(3)  | 113(4) | 1(3)   | 78(3)  | 12(3)  |
| C(12) | 121(4) | 58(3)  | 76(3)  | -4(2)  | 39(3)  | 8(3)   |

|       |        |        |       |        |       |        |
|-------|--------|--------|-------|--------|-------|--------|
| C(13) | 80(3)  | 58(3)  | 88(3) | 0(2)   | 20(2) | -1(2)  |
| C(14) | 62(2)  | 55(2)  | 76(3) | 7(2)   | 28(2) | 1(2)   |
| C(15) | 41(2)  | 58(2)  | 45(2) | 1(2)   | 14(1) | 0(2)   |
| C(16) | 53(2)  | 61(2)  | 57(2) | -1(2)  | 20(2) | -4(2)  |
| C(17) | 58(2)  | 71(3)  | 74(3) | -18(2) | 17(2) | 1(2)   |
| C(18) | 59(2)  | 103(4) | 55(2) | -23(2) | 17(2) | 11(2)  |
| C(19) | 59(2)  | 112(4) | 48(2) | 4(2)   | 26(2) | 7(2)   |
| C(20) | 56(2)  | 70(2)  | 53(2) | 7(2)   | 23(2) | -1(2)  |
| N(1)  | 62(2)  | 56(2)  | 66(2) | 1(2)   | 35(2) | -2(1)  |
| O(1)  | 66(2)  | 65(2)  | 67(2) | -11(1) | 19(1) | -17(1) |
| O(2)  | 88(2)  | 72(2)  | 47(1) | 10(1)  | 27(1) | 5(1)   |
| O(3)  | 65(2)  | 105(2) | 75(2) | -3(2)  | 3(1)  | 5(2)   |
| O(4)  | 105(2) | 88(2)  | 68(2) | 19(2)  | 48(2) | 15(2)  |
| S(1)  | 59(1)  | 56(1)  | 44(1) | 0(1)   | 19(1) | -5(1)  |
| S(2)  | 67(1)  | 70(1)  | 53(1) | 6(1)   | 22(1) | 5(1)   |

**Table 5.** Hydrogen coordinates (  $\times 10^4$ ) and isotropic displacement parameters ( $\text{Å}^2 \times 10^3$ ) for a.

|       | <b>x</b> | <b>y</b> | <b>z</b> | <b>U(eq)</b> |
|-------|----------|----------|----------|--------------|
| H(1)  | 1541     | 1500     | 2769     | 99           |
| H(2)  | 255      | 110      | 3030     | 121          |
| H(3)  | -1229    | -480     | 1851     | 121          |
| H(4)  | -1466    | 317      | 481      | 126          |
| H(5)  | -207     | 1569     | 237      | 105          |
| H(7)  | 2122     | 2903     | 1875     | 117          |
| H(8)  | 1409     | 2272     | 247      | 120          |
| H(10) | 1056     | 6127     | 1133     | 84           |
| H(11) | 1396     | 7713     | 2339     | 106          |
| H(12) | 2909     | 9071     | 2875     | 102          |
| H(13) | 4088     | 8894     | 2226     | 94           |

---

|       |      |       |       |    |
|-------|------|-------|-------|----|
| H(14) | 3782 | 7315  | 1029  | 77 |
| H(16) | 3463 | 46    | 267   | 69 |
| H(17) | 3486 | -1221 | -954  | 84 |
| H(18) | 3849 | 57    | -2012 | 89 |
| H(19) | 4216 | 2603  | -1870 | 85 |
| H(20) | 4213 | 3907  | -638  | 71 |

---

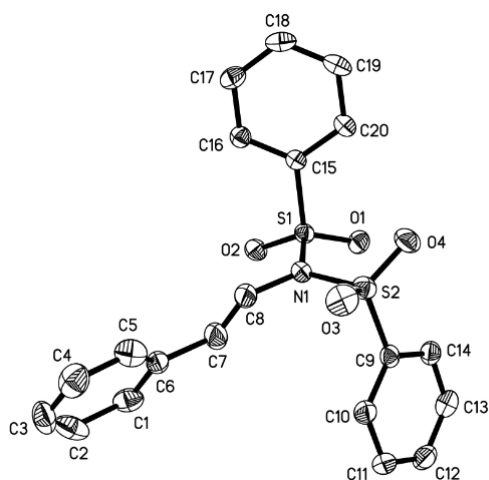

**Figure 1.** ORTEP drawing of C<sub>14</sub>H<sub>14</sub>O<sub>4</sub>S with 50% probability ellipsoids, showing the atomic numbering scheme.

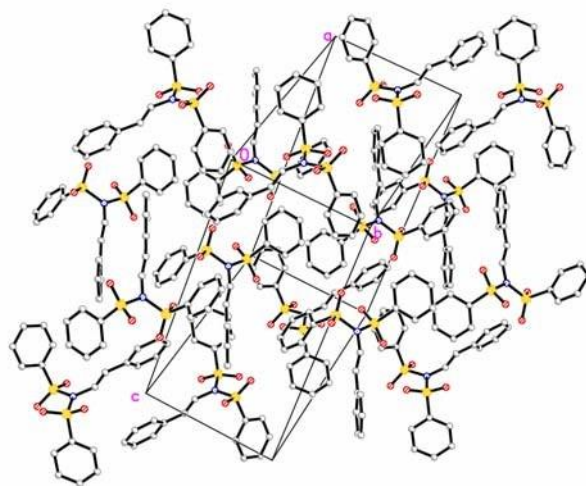

**Figure 2.** A packing view along the *a* direction

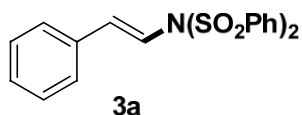

**(E)-N-(phenylsulfonyl)-N-styrylbenzenesulfonamide (3a):** Compound **3a** was obtained in 76% yield (91 mg) according to the general procedure. Eluent petroleum ether/ethyl acetate (4:1).  $^1\text{H}$  NMR ( $\text{CDCl}_3$ , 500 MHz, ppm)  $\delta$  8.00 (d, 4H,  $J = 10.0$  Hz), 7.69-7.66 (m, 2H), 7.58-7.55 (m, 4H), 7.35 (m, 5H), 6.69 (d, 1H,  $J = 15.0$ ), 6.52 (d, 1H,  $J = 15.0$ ).  $^{13}\text{C}$  NMR ( $\text{CDCl}_3$ , 100 MHz, ppm)  $\delta$  139.5, 139.1, 134.0, 129.4, 129.1, 128.9, 128.2, 127.3, 119.5, 119.1. HRMS  $m/z$  calcd. for  $\text{C}_{20}\text{H}_{17}\text{KNO}_4\text{S}_2$   $[\text{M}+\text{K}]^+$ : 438.0236, found: 438.0239.

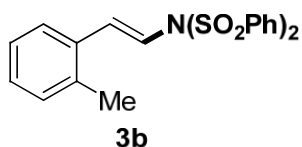

**(E)-N-(2-methylstyryl)-N-(phenylsulfonyl)benzenesulfonamide (3b):** Compound **3b** was obtained in 71% yield (88 mg) according to the general procedure. Eluent petroleum ether/ethyl acetate (4:1).  $^1\text{H}$  NMR ( $\text{CDCl}_3$ , 500 MHz, ppm)  $\delta$  8.04 (d, 3H,  $J = 10.0$  Hz), 7.72-7.69 (m, 2H), 7.61-7.58 (m, 4H), 7.41 (d, 1H,  $J = 10.0$  Hz), 7.29-7.26 (m, 2H), 7.21 (d, 1H,  $J = 10.0$  Hz), 6.92 (d, 1H,  $J = 15.0$ ), 6.39 (d, 1H,  $J = 15.0$ ), 2.26 (s, 3H).  $^{13}\text{C}$  NMR ( $\text{CDCl}_3$ , 100 MHz, ppm)  $\delta$  139.6, 137.9, 136.6, 134.0, 132.9, 130.5, 129.3, 129.1, 128.2, 126.4, 126.3, 120.4, 19.7. HRMS  $m/z$  calcd. for  $\text{C}_{21}\text{H}_{19}\text{NNaO}_4\text{S}_2$   $[\text{M}+\text{Na}]^+$ : 436.0653, found: 436.0650.

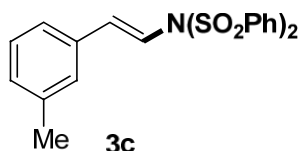

**(E)-N-(3-methylstyryl)-N-(phenylsulfonyl)benzenesulfonamide (3c):** Compound **3c** was obtained in 74% yield (92 mg) according to the general procedure. Eluent petroleum ether/ethyl acetate (3:1). <sup>1</sup>H NMR (CDCl<sub>3</sub>, 500 MHz, ppm) δ 8.03 (d, 4H, *J* = 10.0 Hz), 7.71-7.68 (m, 2H), 7.60-7.57 (m, 4H), 7.26 (d, 1H, *J* = 10.0 Hz), 7.21-7.18 (m, 3H), 6.92 (d, 1H, *J* = 15.0), 6.55 (d, 1H, *J* = 15.0), 2.38 (s, 3H). <sup>13</sup>C NMR (CDCl<sub>3</sub>, 100 MHz, ppm) δ 139.6, 139.3, 138.5, 134.0, 133.7, 130.2, 129.1, 128.8, 128.2, 127.9, 124.5, 119.2, 21.3. HRMS *m/z* calcd. for C<sub>21</sub>H<sub>19</sub>NNaO<sub>4</sub>S<sub>2</sub> [M+Na]<sup>+</sup>: 436.0653, found: 436.0650.

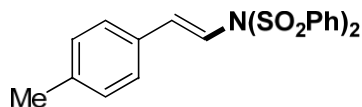

**(E)-N-(4-methylstyryl)-N-(phenylsulfonyl)benzenesulfonamide (3d):** Compound **3d** was obtained in 87% yield (108 mg) according to the general procedure. Eluent petroleum ether/ethyl acetate (5:1). <sup>1</sup>H NMR (CDCl<sub>3</sub>, 500 MHz, ppm) δ 7.99 (d, 3H, *J* = 10.0 Hz), 7.67 (t, 2H, *J* = 5.0 Hz), 7.57-7.54 (m, 4H), 7.27-7.24 (m, 3H), 7.19-7.15 (m, 2H), 6.63 (d, 1H, *J* = 15.0), 6.46 (d, 1H, *J* = 15.0), 2.36 (s, 3H). <sup>13</sup>C NMR (CDCl<sub>3</sub>, 100 MHz, ppm) δ 139.6, 139.3, 134.0, 130.1, 129.5, 129.1, 128.2, 127.2, 121.4, 119.1, 23.4. HRMS *m/z* calcd. for C<sub>21</sub>H<sub>19</sub>NNaO<sub>4</sub>S<sub>2</sub> [M+Na]<sup>+</sup>: 436.0653, found: 436.0650.

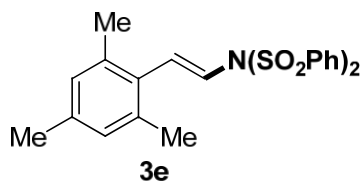

**(E)-N-(phenylsulfonyl)-N-(2,4,6-trimethylstyryl)benzenesulfonamide (3e):**

Compound **3e** was obtained in 54% yield (71 mg) according to the general procedure. Eluent petroleum ether/ethyl acetate (4:1). <sup>1</sup>H NMR (CDCl<sub>3</sub>, 500 MHz, ppm) δ 8.07 (d, 4H, *J* = 5.0 Hz), 7.71-7.68 (m, 2H), 7.61-7.58 (m, 4H), 6.90 (s, 2H), 6.76 (d, 1H, *J* = 15.0), 6.08 (d, 1H, *J* = 15.0), 2.30 (s, 9H). <sup>13</sup>C NMR (CDCl<sub>3</sub>, 100 MHz, ppm) δ 139.8, 139.1, 138.0, 136.6, 134.0, 129.7, 129.2, 128.8, 128.2, 123.5, 21.0, 20.8. HRMS *m/z* calcd. for C<sub>23</sub>H<sub>23</sub>NNaO<sub>4</sub>S<sub>2</sub> [M+Na]<sup>+</sup>: 464.0966, found: 464.0967.

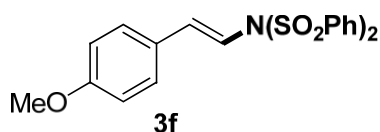

**(E)-N-(4-methoxystyryl)-N-(phenylsulfonyl)benzenesulfonamide (3f):** Compound **3d** was obtained in 66% yield (85 mg) according to the general procedure. Eluent petroleum ether/ethyl acetate (4:1). <sup>1</sup>H NMR (CDCl<sub>3</sub>, 500 MHz, ppm) δ 8.02 (d, 4H, *J* = 10.0 Hz), 7.70-7.67 (m, 2H), 7.59-7.56 (m, 4H), 7.32(d, 2H, *J* = 10.0 Hz), 6.90 (d, 2H, *J* = 10.0 Hz), 6.63 (d, 1H, *J* = 15.0), 6.40 (d, 1H, *J* = 15.0), 3.84 (s, 3H). <sup>13</sup>C NMR (CDCl<sub>3</sub>, 100 MHz, ppm) δ 160.6, 139.6, 139.3, 133.9, 129.1, 128.7, 128.2, 126.3, 117.1, 114.2, 55.4. HRMS *m/z* calcd. for C<sub>21</sub>H<sub>19</sub>NNaO<sub>5</sub>S<sub>2</sub> [M+Na]<sup>+</sup>: 452.0602, found: 452.0611.

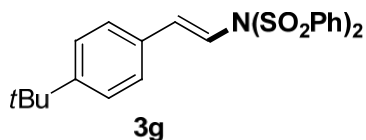

**(E)-N-(4-tert-butylstyryl)-N-(phenylsulfonyl)benzenesulfonamide (3g):** Compound **3g** was obtained in 65% yield (89 mg) according to the general procedure. Eluent petroleum ether/ethyl acetate (4:1). <sup>1</sup>H NMR (CDCl<sub>3</sub>, 500 MHz, ppm) δ 8.03 (d, 4H, *J*

= 10.0 Hz), 7.71-7.68 (m, 2H), 7.60-7.57 (m, 4H), 7.41(d, 2H,  $J = 10.0$  Hz), 7.34 (d, 2H,  $J = 10.0$  Hz), 6.69 (d, 1H,  $J = 15.0$ ), 6.53 (d, 1H,  $J = 15.0$ ), 1.35 (s, 9H).  $^{13}\text{C}$  NMR ( $\text{CDCl}_3$ , 100 MHz, ppm)  $\delta$  152.9, 139.7, 139.2, 134.0, 131.0, 129.1, 128.2, 127.1, 125.8, 118.7, 34.8, 31.2. HRMS  $m/z$  calcd. for  $\text{C}_{24}\text{H}_{25}\text{NNaO}_4\text{S}_2$   $[\text{M}+\text{Na}]^+$ : 478.1123, found: 478.1126.

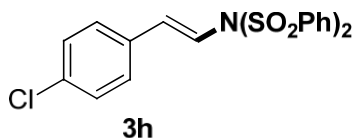

**(E)-N-(4-chlorostyryl)-N-(phenylsulfonyl)benzenesulfonamide (3h):** Compound **3h** was obtained in 62% yield (80 mg) according to the general procedure. Eluent petroleum ether/ethyl acetate (5:1).  $^1\text{H}$  NMR ( $\text{CDCl}_3$ , 500 MHz, ppm)  $\delta$  7.99 (d, 4H,  $J = 10.0$  Hz), 7.70-7.67 (m, 2H), 7.58-7.55 (m, 4H), 7.33-7.27 (m, 4H), 6.66 (d, 1H,  $J = 15.0$ ), 6.52 (d, 1H,  $J = 15.0$ ), 3.84 (s, 3H).  $^{13}\text{C}$  NMR ( $\text{CDCl}_3$ , 100 MHz, ppm)  $\delta$  139.5, 137.4, 134.1, 129.2, 129.1, 128.4, 128.2, 121.4, 120.1, 119.1. HRMS  $m/z$  calcd. for  $\text{C}_{20}\text{H}_{16}\text{ClNNaO}_4\text{S}_2$   $[\text{M}+\text{Na}]^+$ : 456.0107, found: 456.0108.

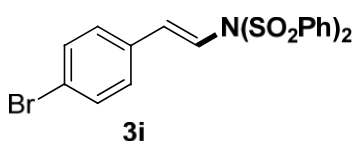

**(E)-N-(4-bromostyryl)-N-(phenylsulfonyl)benzenesulfonamide (3i):** Compound **3i** was obtained in 59% yield (84 mg) according to the general procedure. Eluent petroleum ether/ethyl acetate (50:1).  $^1\text{H}$  NMR ( $\text{CDCl}_3$ , 500 MHz, ppm)  $\delta$  8.01 (d, 4H,  $J = 10.0$  Hz), 7.70 (t, 2H,  $J = 10.0$  Hz), 7.60-7.50 (m, 4H), 7.50 (d, 2H,  $J = 10.0$  Hz), 7.24 (d, 2H,  $J = 10.0$  Hz), 6.66 (d, 1H,  $J = 15.0$ ), 6.55 (d, 1H,  $J = 15.0$ ).  $^{13}\text{C}$  NMR ( $\text{CDCl}_3$ , 100 MHz, ppm)  $\delta$  139.4, 137.4, 134.1, 132.0, 129.9, 129.2, 128.7, 128.2,

123.5, 120.1. HRMS  $m/z$  calcd. for  $C_{20}H_{16}BrNNaO_4S_2$   $[M+Na]^+$ : 499.9602, found: 499.9601; 501.9577.

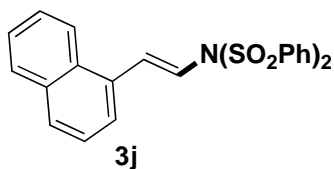

**(E)-N-(2-(naphthalen-1-yl)vinyl)-N-(phenylsulfonyl)benzenesulfonamide (3j):**

Compound **3j** was obtained in 74% yield (100 mg) according to the general procedure. Eluent petroleum ether/ethyl acetate (4:1).  $^1H$  NMR ( $CDCl_3$ , 500 MHz, ppm)  $\delta$  8.09 (d, 4H,  $J = 10.0$  Hz), 7.90-7.87 (m, 3H), 7.73-7.70 (m, 2H), 7.62-7.59 (m, 5H), 7.56-7.54 (m, 5H), 7.50-7.46 (m, 5H), 6.56 (d, 1H,  $J = 15.0$ ).  $^{13}C$  NMR ( $CDCl_3$ , 100 MHz, ppm)  $\delta$  139.6, 137.4, 134.1, 133.6, 131.3, 131.2, 129.7, 129.2, 128.6, 128.3, 126.8, 126.3, 125.5, 124.9, 123.8, 121.7. HRMS  $m/z$  calcd. for  $C_{24}H_{19}NNaO_4S_2$   $[M+Na]^+$ : 472.0653, found: 472.0651.

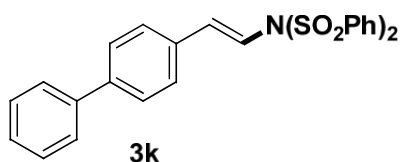

**(E)-N-(2-(naphthalen-1-yl)vinyl)-N-(phenylsulfonyl)benzenesulfonamide (3k):**

Compound **3k** was obtained in 56% yield (79 mg) according to the general procedure. Eluent petroleum ether/ethyl acetate (5:1).  $^1H$  NMR ( $CDCl_3$ , 500 MHz, ppm)  $\delta$  8.05 (d, 4H,  $J = 10.0$  Hz), 7.73-7.70 (m, 1H), 7.61-7.59 (m, 4H), 7.50-7.47 (m, 2H), 7.34 (d, 4H,  $J = 10.0$  Hz), 7.17 (d, 4H,  $J = 10.0$  Hz), 6.75-6.69 (m, 2H), 6.60 (d, 1H,  $J = 15.0$ ).  $^{13}C$  NMR ( $CDCl_3$ , 100 MHz, ppm)  $\delta$  142.2, 140.2, 139.6, 137.6, 136.7, 134.0, 129.2, 128.9, 128.3, 127.7, 127.5, 127.0, 126.1, 119.3. HRMS  $m/z$  calcd. for  $C_{26}H_{21}NNaO_4S_2$   $[M+H]^+$ : 498.0810, found: 498.0812.



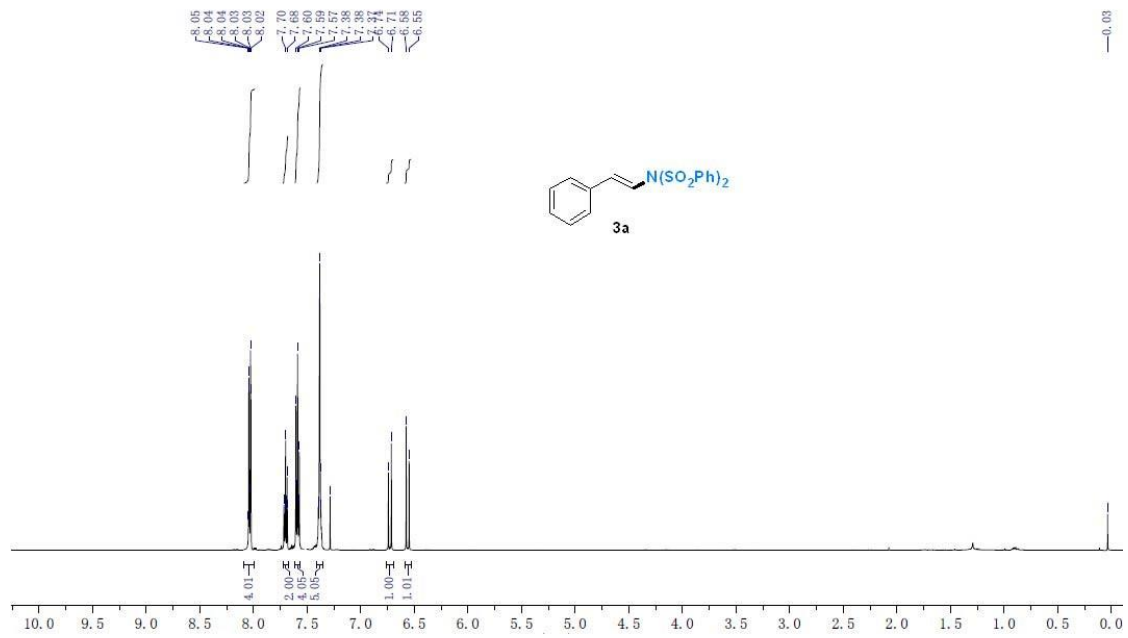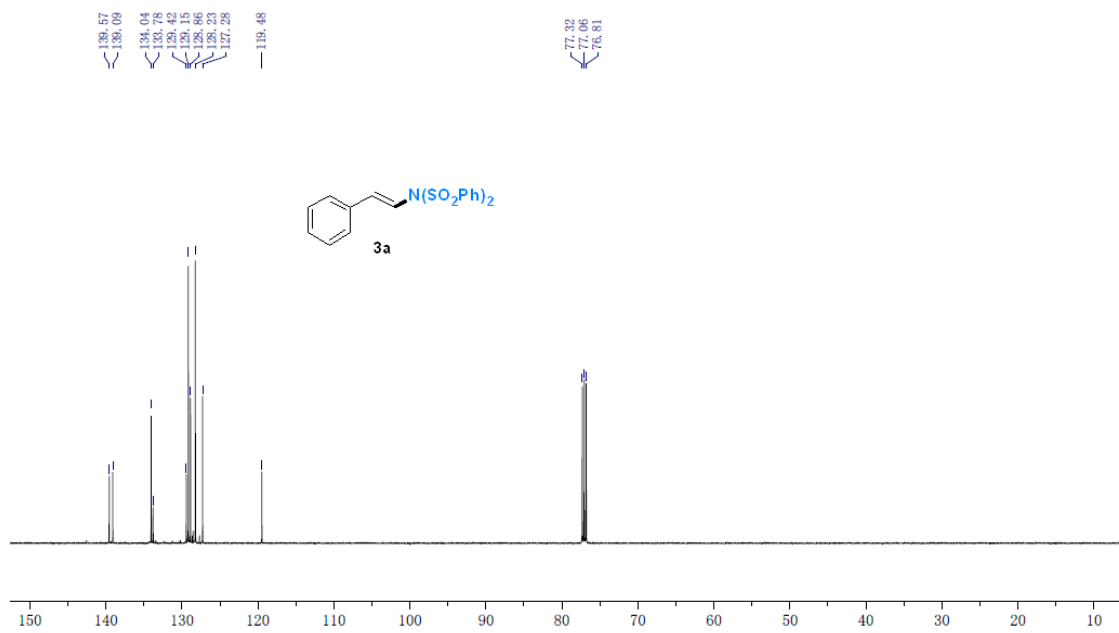

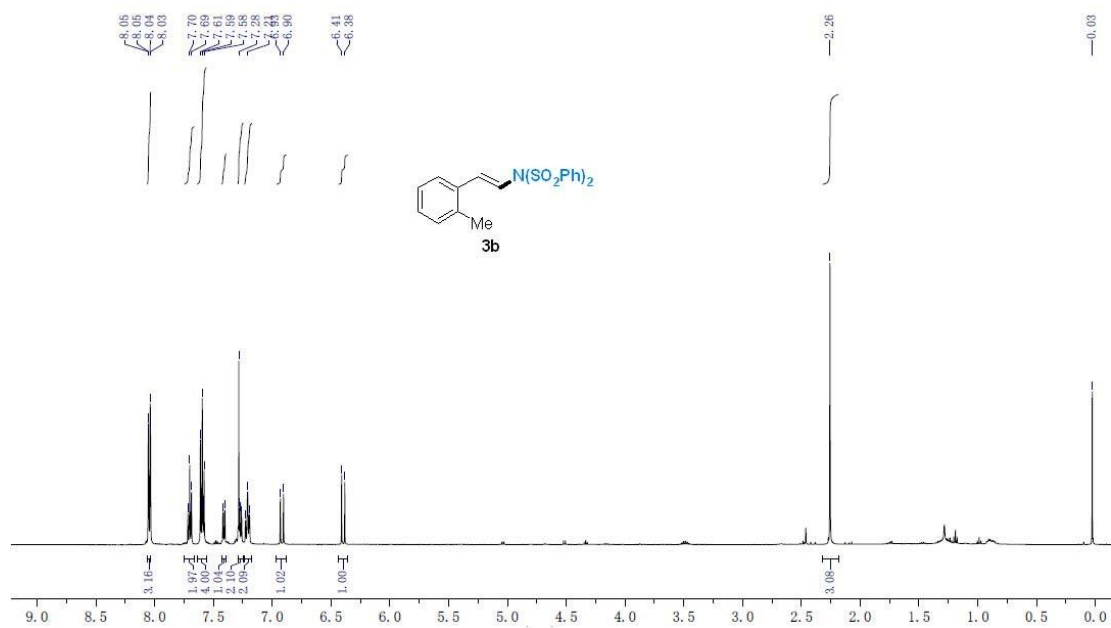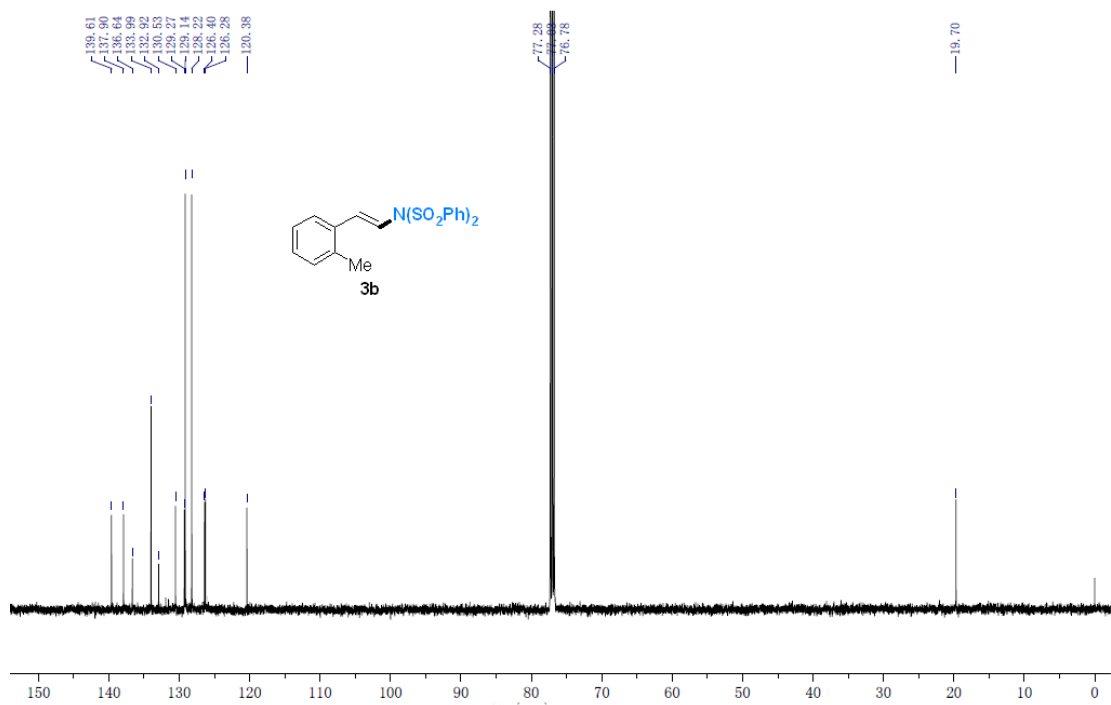

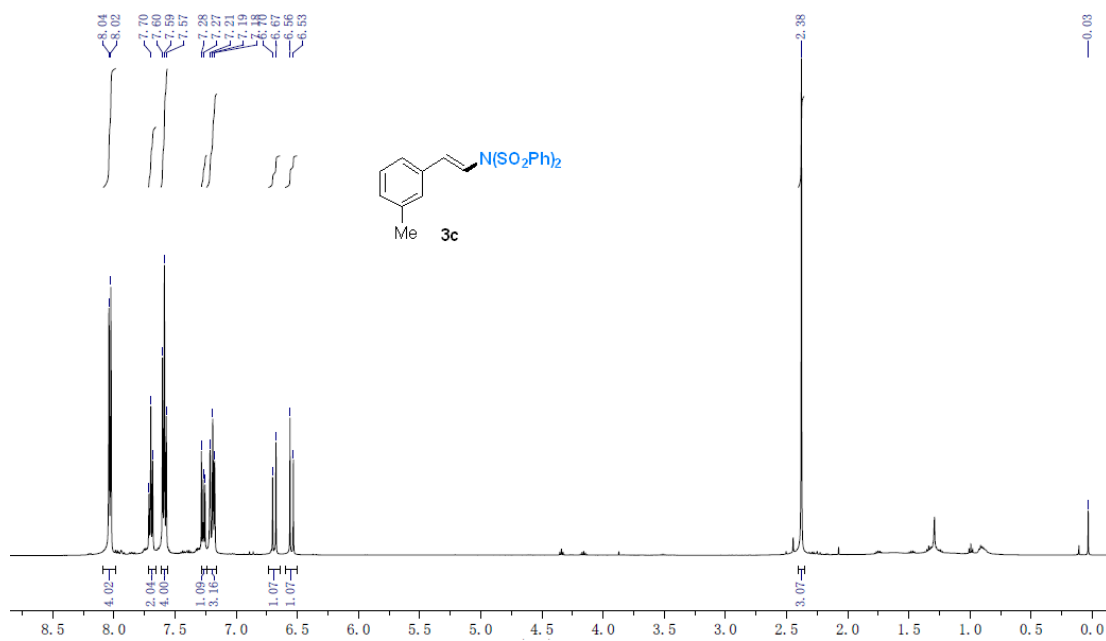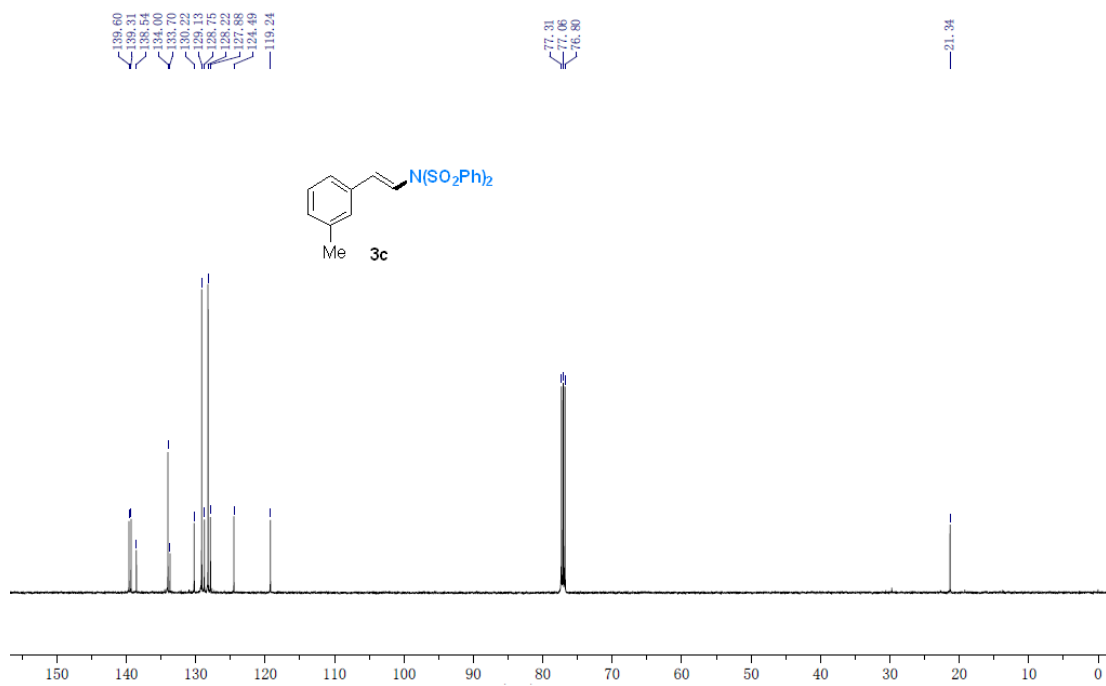

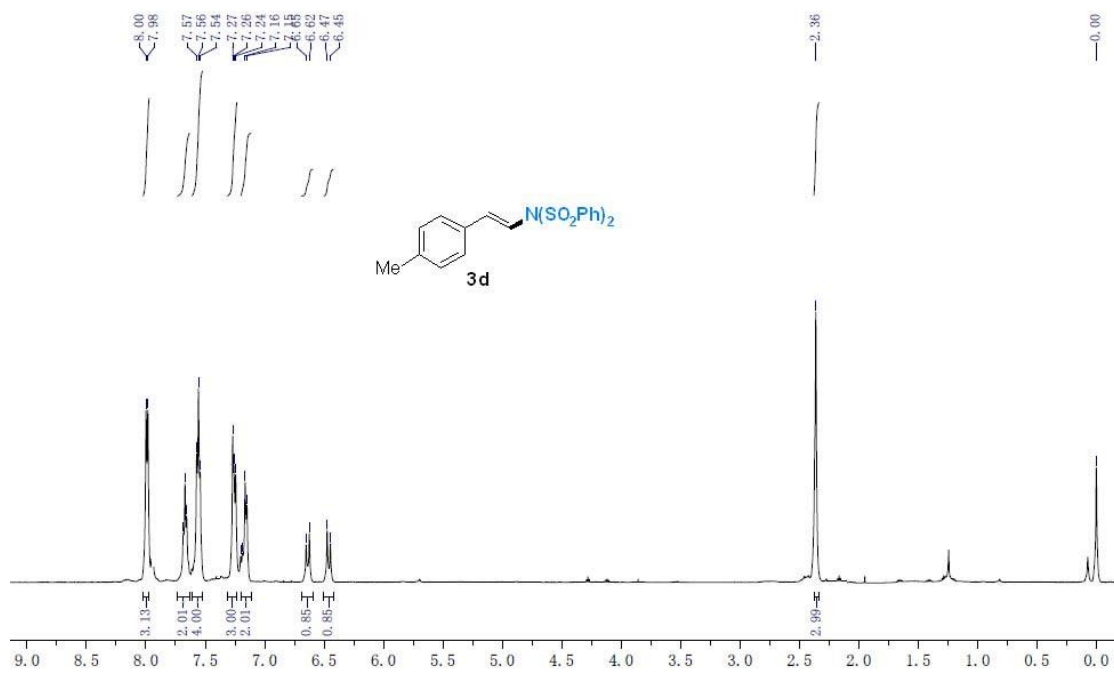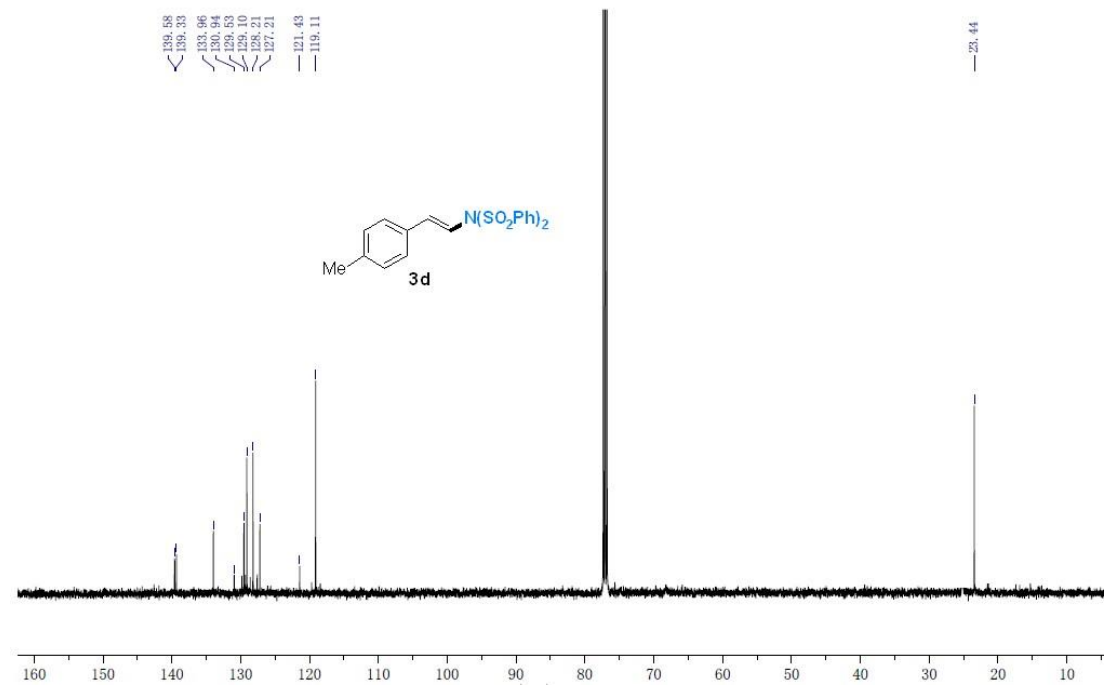

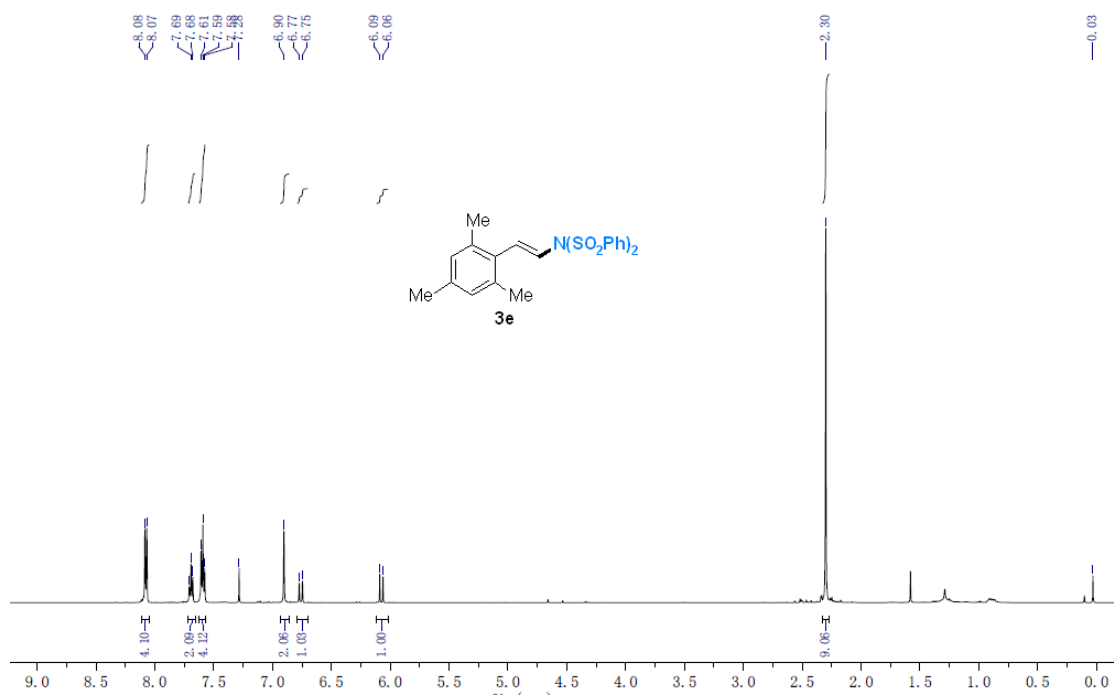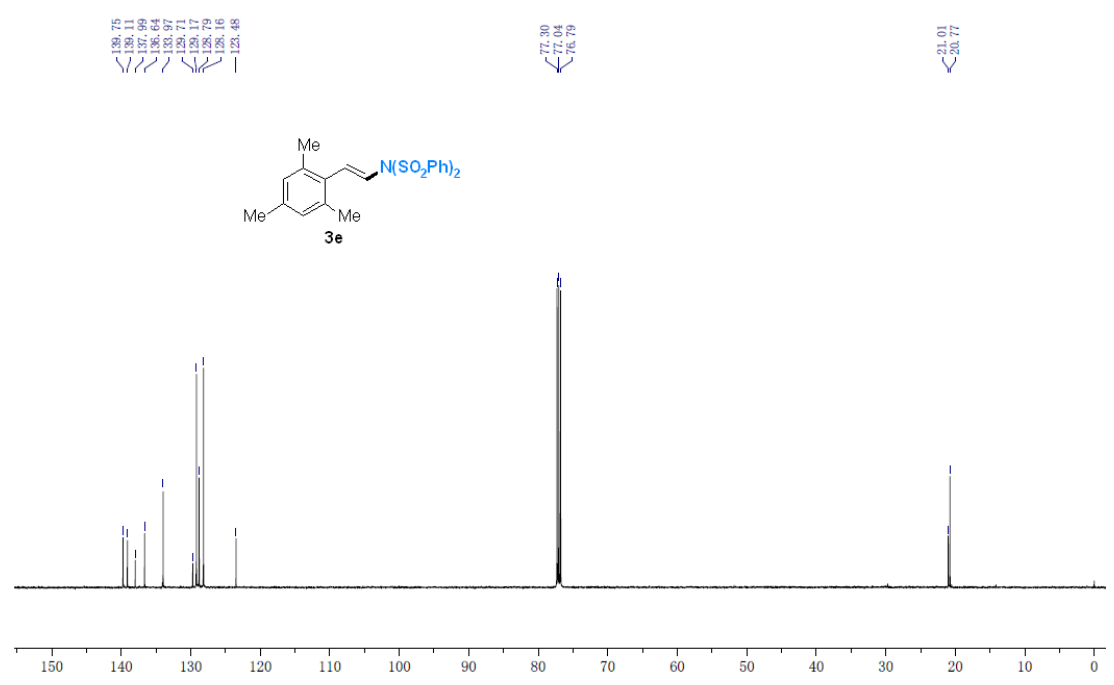

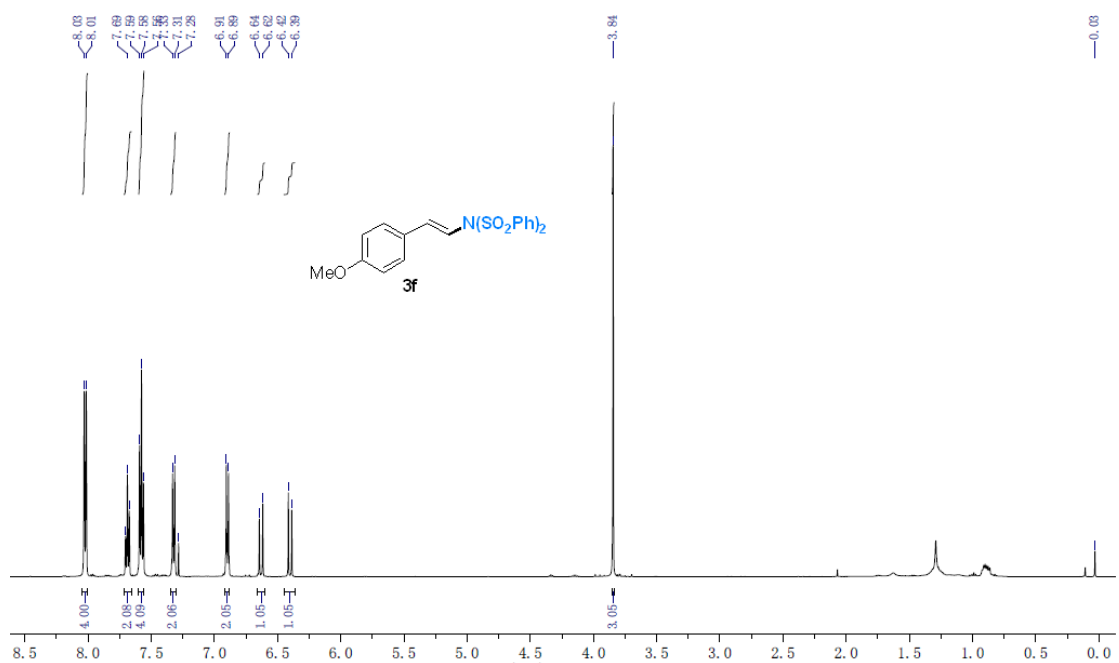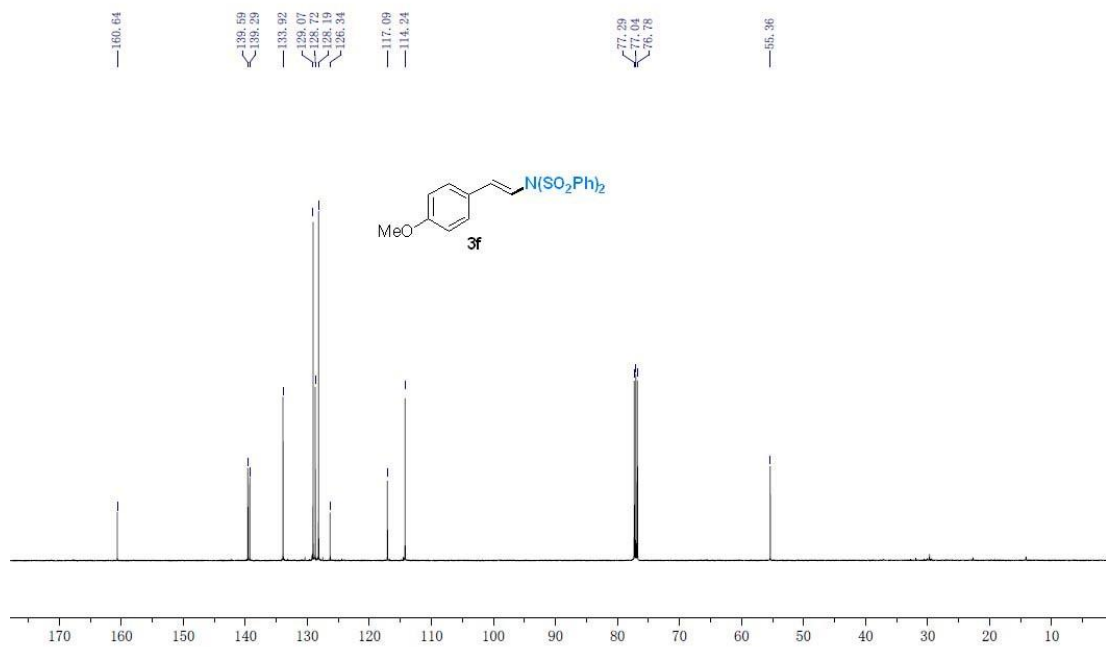

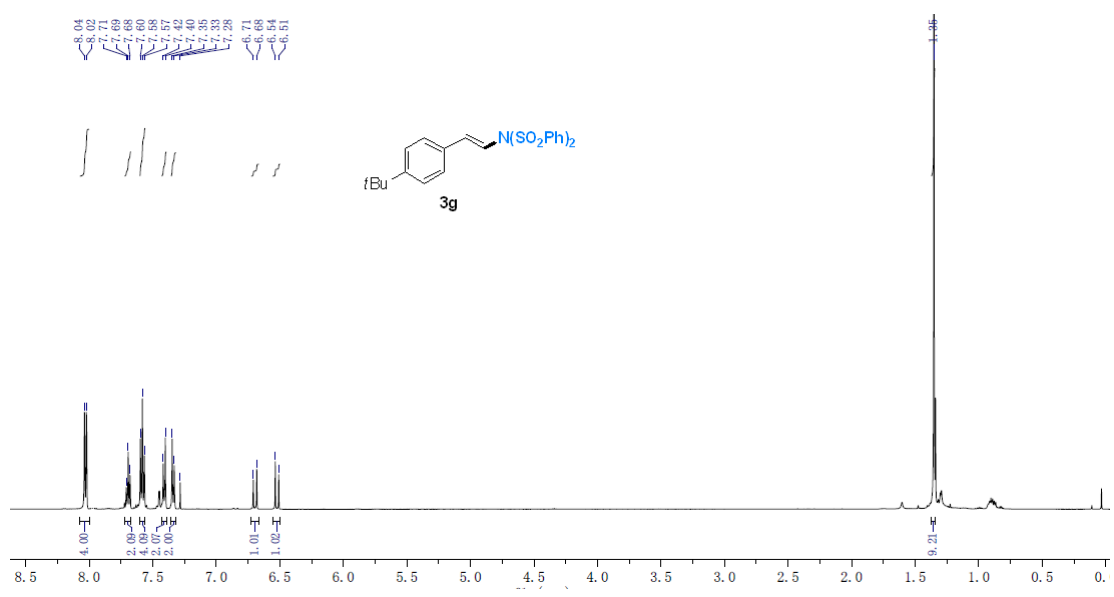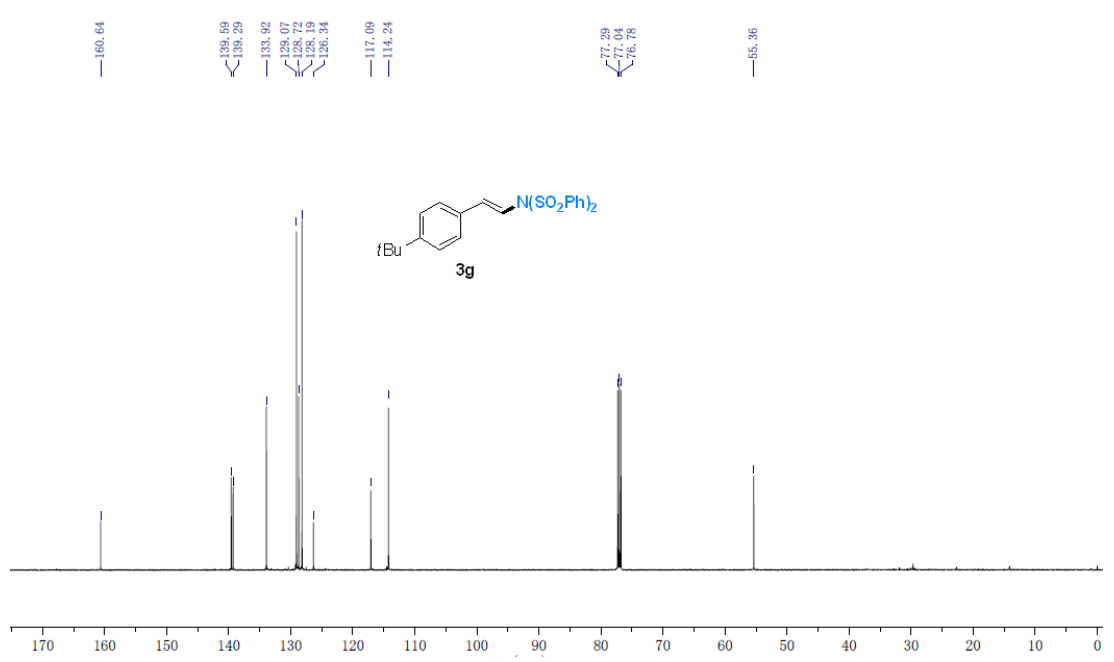

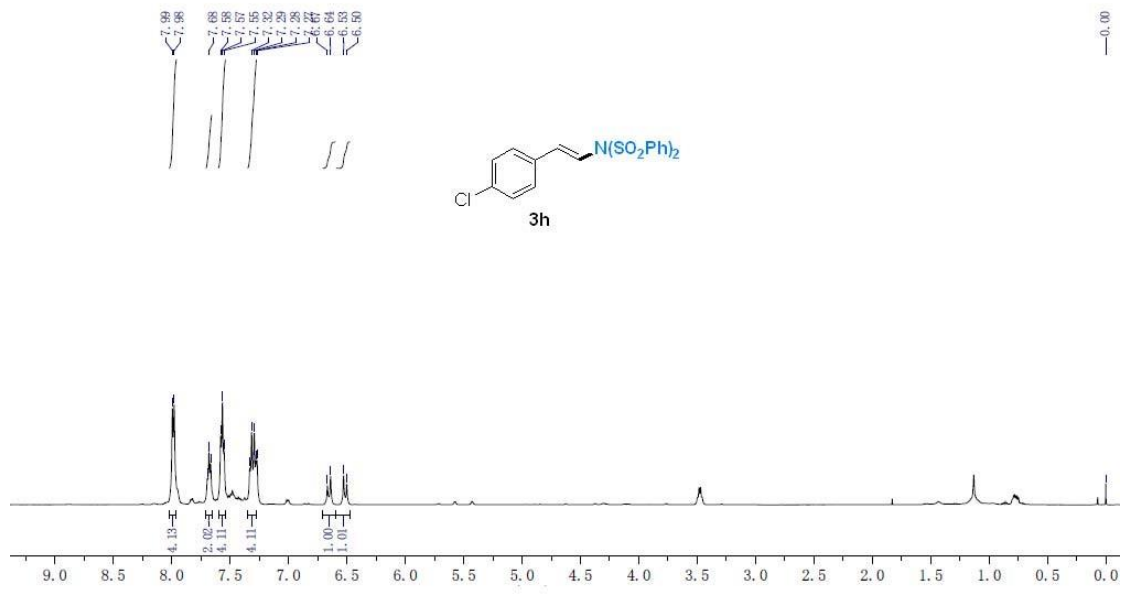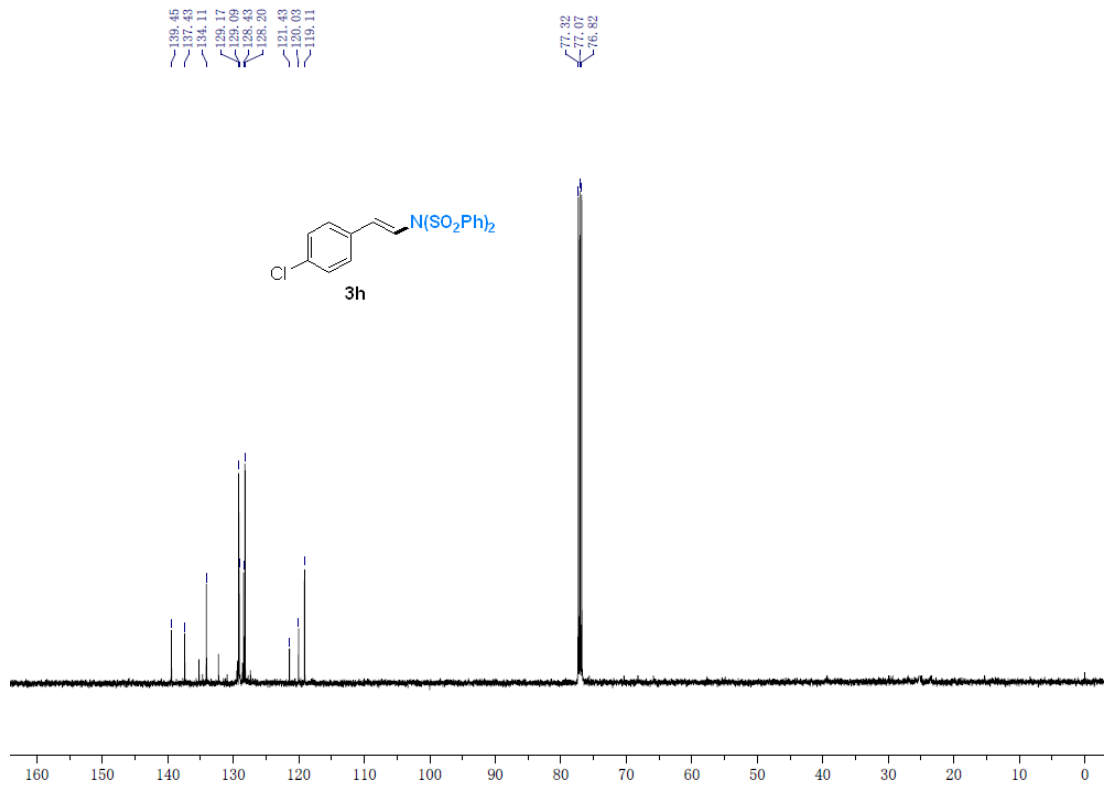



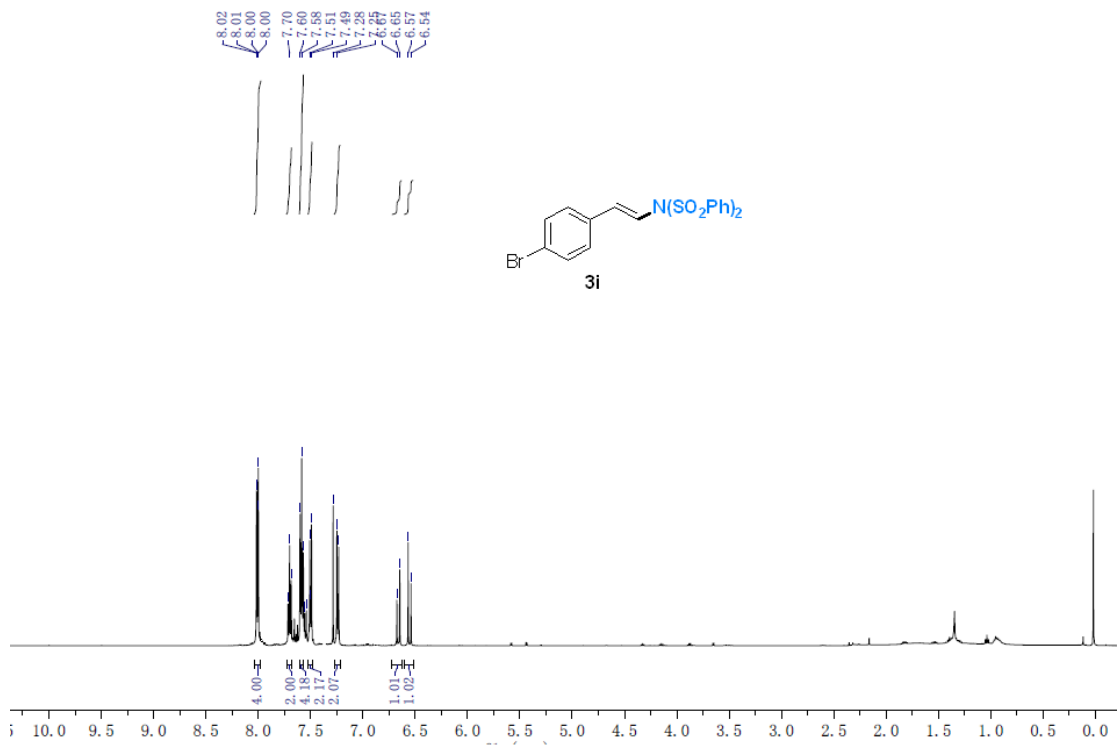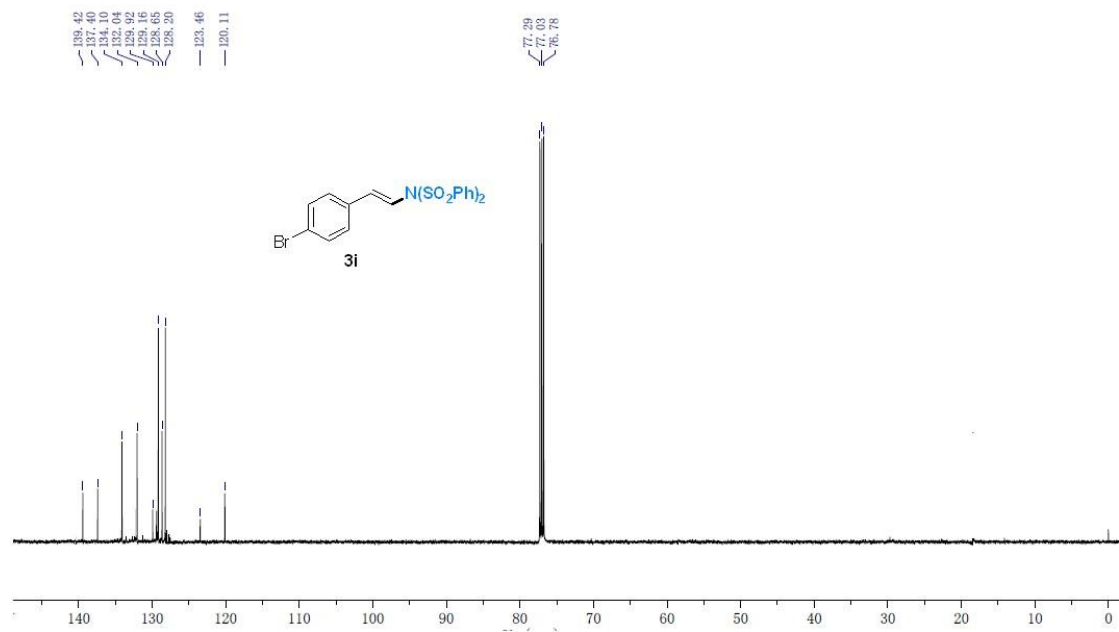

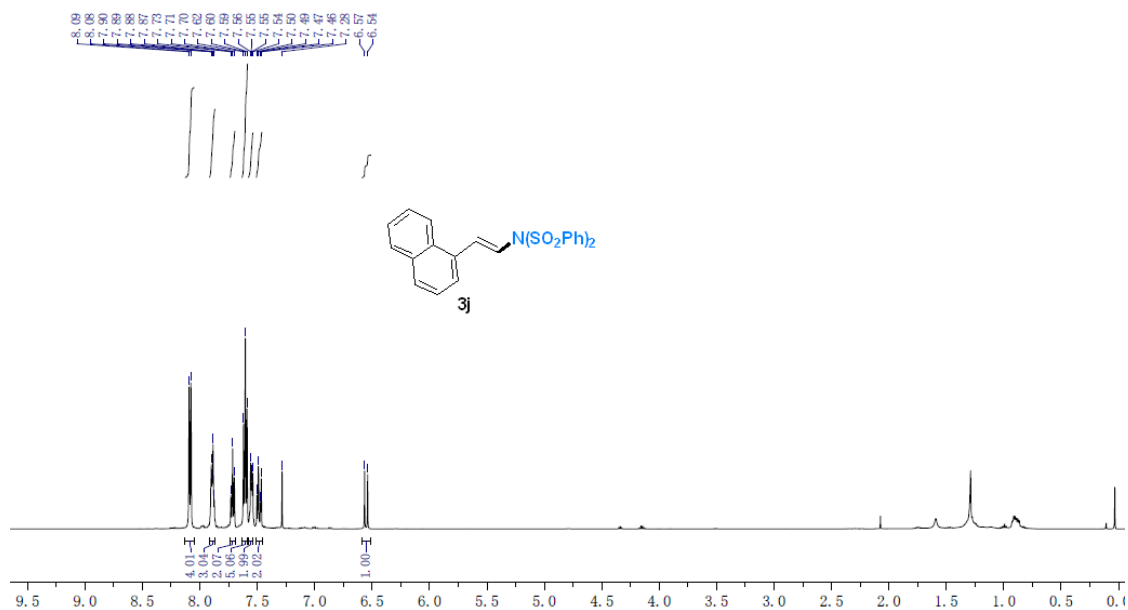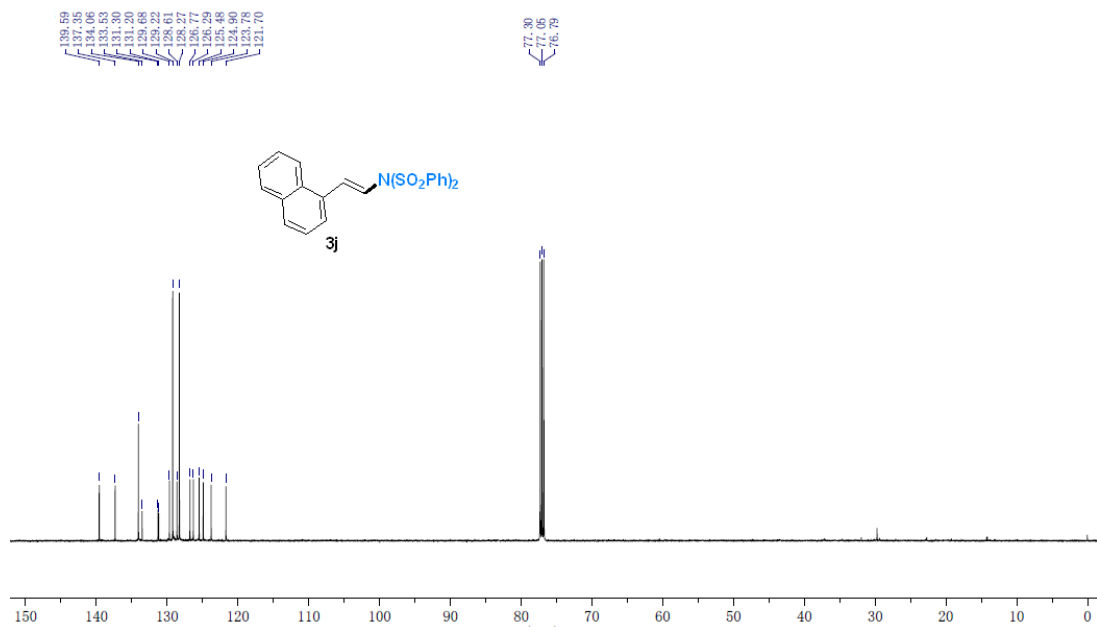

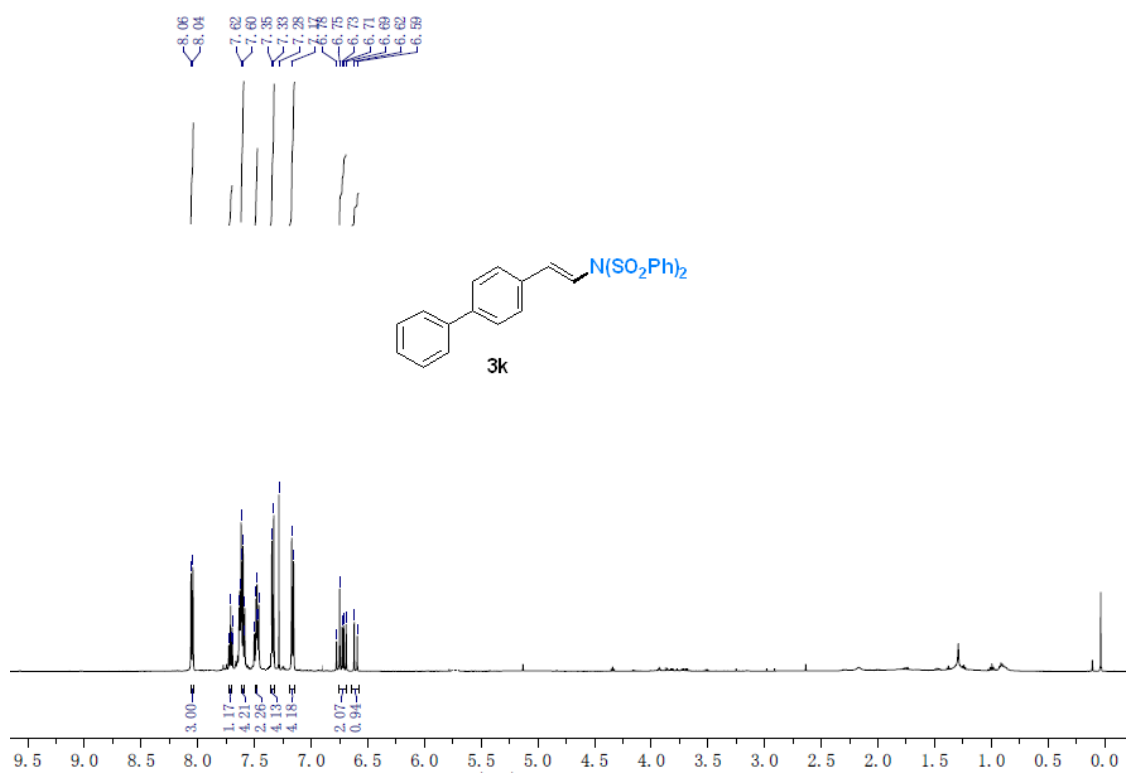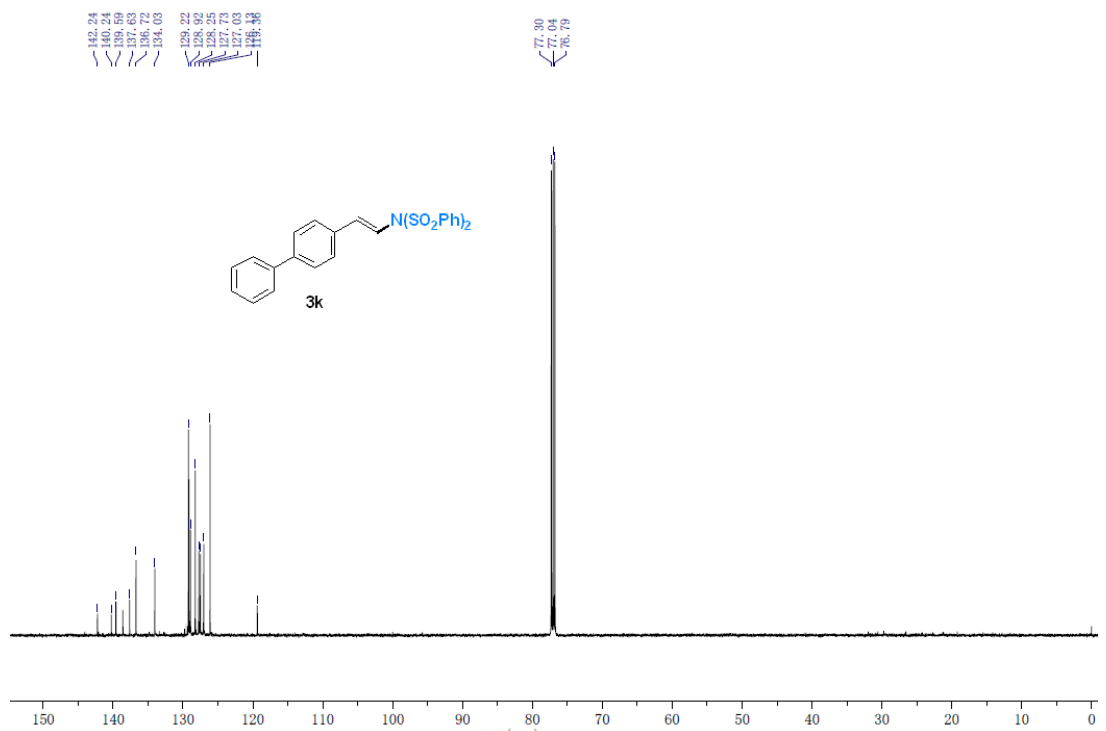

Supplement: c6ra16115d1.pdf [file c6ra16115d1.pdf]
